# Supplementary material for: Acrylamide Exposure from Common Culinary Preparations in Spain, in Household, Catering and Industrial Settings
Source: MDPI journal article supplement (doi:10.3390/foods10092008), 2021-08-26
Supplement: s1 [file s1]

# Acrylamide Exposure from Common Culinary Preparations in Spain, in Household, Catering and Industrial Settings

Lucía González-Mulero, Marta Mesías \*, Francisco J Morales, Cristina Delgado-Andrade

## SUPPLEMENTARY

**Table S1.** Ingredients and culinary treatments used in the preparation of different food groups analyzed in the present study.

| Food group                                             | Ingredients                                                                                                                   | Culinary treatment* |
|--------------------------------------------------------|-------------------------------------------------------------------------------------------------------------------------------|---------------------|
| Potato-based food                                      |                                                                                                                               |                     |
| Chips                                                  | Potatoes, salt                                                                                                                | Frying              |
| Spanish omelette                                       | Potatoes, salt, eggs and optionally (onion)                                                                                   | Frying              |
| Cereal-based food                                      |                                                                                                                               |                     |
| <i>Torrijas</i>                                        | Sliced wheat-flour bread, milk, eggs, sugar, cinnamon                                                                         | Frying              |
| Sponge cake                                            | Wheat flour, sugar, eggs, baking powder, and optionally (shortenings, vegetable oils)                                         | Roasting            |
| Food based on cereal mix with meat, fish or vegetables |                                                                                                                               |                     |
| Breaded fillet                                         | Chicken fillet, breadcrumbs, wheat flour, eggs                                                                                | Roasting/frying     |
| Ham and cheese fillet                                  | Cooked ham, cheese, pork fillet, breadcrumbs, wheat flour, eggs                                                               | Frying              |
| Pizza                                                  | Pizza dough, tomato, cheese and other ingredients such as oregano, meat, cooked ham, bacon, olives, tuna or mushrooms         | Roasting            |
| Puff pastry pies                                       | Puff pastry, tomato, tuna, red pepper                                                                                         | Roasting            |
| Patties                                                | Dough of patties, tomato, tuna, hard-boiled egg, red pepper                                                                   | Roasting/Frying     |
| <i>Migas</i>                                           | Wheat-flour bread, green pepper, bacon, chorizo sausage, garlic, paprika, and optionally (grapes, pork meat)                  | Sautéed             |
| Croquettes                                             | Bechamel sauce (milk, wheat flour), breadcrumbs, egg and other ingredients such as cooked ham, bacon, chicken, tuna or cheese | Frying              |

\*All the frying treatments used vegetable oils.
